# Supplementary material for: The Tumor Mutational Burden of Chinese Advanced Cancer Patients Estimated by a 381-cancer-gene Panel
Source: PubMed Central journal article supplement — J Cancer. 2018 Jun 6;9(13):2302–7. doi: 10.7150/jca.24932 (PMC6036723; doi:10.7150/jca.24932), 2018-06-06
Supplement: jcav09p2302s1.pdf [file jcav09p2302s1.pdf]

Table S2. Genes associated with increased TMB.

---

| Gene list |      |        |       |        |       |       |       |       |      |
|-----------|------|--------|-------|--------|-------|-------|-------|-------|------|
| ABL1      | APC  | AR     | ATR   | FANCD2 | FAT1  | KMT2C | KMT2D | LIMK1 | LRP1 |
| LRP1B     | MTOR | NOTCH1 | POLD1 | PREX2  | PRKDC | PTCH1 | SDHA  | SPTA1 | TP53 |

---
